# Supplementary material
Source: PubMed Central journal article supplement (PMC7832223)
Supplement: mmc1.pdf [file mmc1.pdf]

# THE LANCET

## Digital Health

### Supplementary appendix

This appendix formed part of the original submission and has been peer reviewed. We post it as supplied by the authors.

Supplement to: Fegan G, Cheah PY, and the Data Sharing Working Group. Solutions to COVID-19 data sharing. *Lancet Digit Health* 2020; published online Dec 1. [https://doi.org/10.1016/S2589-7500\(20\)30273-9](https://doi.org/10.1016/S2589-7500(20)30273-9).

**The Data Sharing Working Group members (listed alphabetically)**

| <b>Full name and highest degree</b>                      | <b>Initial &amp; Surname</b> | <b>e-mail</b>                                                                | <b>Affiliate institution and country</b>                                                                                                                                                                                                                          |
|----------------------------------------------------------|------------------------------|------------------------------------------------------------------------------|-------------------------------------------------------------------------------------------------------------------------------------------------------------------------------------------------------------------------------------------------------------------|
| Julie Archer, MPH<br>(Coalition Secretariat Coordinator) | J. Archer                    | <a href="mailto:jarcher@dndi.org">jarcher@dndi.org</a>                       | Drugs for Neglected Diseases Initiative (DNDi), Geneva, Switzerland                                                                                                                                                                                               |
| Ken Awuondo, MSc                                         | K. Awuondo                   | <a href="mailto:ken.awuondo@gmail.com">ken.awuondo@gmail.com</a>             | The Global Health Network, Nairobi, Kenya                                                                                                                                                                                                                         |
| Dr Susan Bull, PhD                                       | S. Bull                      | <a href="mailto:susan.bull@ethox.ox.ac.uk">susan.bull@ethox.ox.ac.uk</a>     | The Ethox Centre and Wellcome Centre for Ethics and Humanities, Nuffield Department of Population Health, University of Oxford, Oxford, UK                                                                                                                        |
| *Professor Phaik Yeong Cheah, PhD (Working Group Chair)  | P. Y. Cheah                  | <a href="mailto:Phaikyeong@tropmedres.ac">Phaikyeong@tropmedres.ac</a>       | 1) Mahidol Oxford Tropical Medicine Research Unit (MORU), Faculty of Tropical Medicine, Mahidol University, TBangkok, Thailand<br>2) ) Centre for Tropical Medicine and Global Health, Nuffield Department of Clinical Medicine, University of Oxford, Oxford, UK |
| *Professor Greg Fegan, PhD                               | G. Fegan                     | <a href="mailto:g.w.fegan@swansea.ac.uk">g.w.fegan@swansea.ac.uk</a>         | Institute of Life Science 2, Swansea University Medical School, Swansea University, Swansea, UK                                                                                                                                                                   |
| Terry Robert Fraser, MPhil                               | T. R. Fraser                 | <a href="mailto:terryr@who.int">terryr@who.int</a>                           | Special Programme for Research and Training in Tropical Diseases (TDR), World Health Organisation, Geneva, Switzerland                                                                                                                                            |
| Professor Philippe Guerin, MD                            | P. Guerin                    | <a href="mailto:philippe.guerin@iddo.org">philippe.guerin@iddo.org</a>       | Infectious Diseases Data Observatory (IDDO), Centre for Tropical Medicine and Global Health, Nuffield Department of Medicine, University of Oxford, UK                                                                                                            |
| Dr Calvin WL Ho, JSD                                     | C. W. L. Ho                  | <a href="mailto:cwlho@hku.hk">cwlho@hku.hk</a>                               | Faculty of Law and Centre for Medical Ethics and Law, University of Hong Kong, Hong Kong                                                                                                                                                                          |
| Dr Oommen John, MD                                       | O. John                      | <a href="mailto:susheel.john@gmail.com">susheel.john@gmail.com</a>           | The George Institute for Global Health, New Delhi, India                                                                                                                                                                                                          |
| Dr Sharon Kaur, PhD                                      | S. Kaur                      | <a href="mailto:kaursh@um.edu.my">kaursh@um.edu.my</a>                       | Faculty of Law, University of Malaya, Kuala Lumpur, Malaysia                                                                                                                                                                                                      |
| Dr David Maman, MD<br>(Coalition Scientific Manager)     | D. Maman                     | <a href="mailto:dmaman@extern.dndi.org">dmaman@extern.dndi.org</a>           | Drugs for Neglected Diseases Initiative (DNDi), Geneva, Switzerland                                                                                                                                                                                               |
| Dr Lauren Maxwell, PhD                                   | L. Maxwell                   | <a href="mailto:lauren.maxwell.us@gmail.com">lauren.maxwell.us@gmail.com</a> |                                                                                                                                                                                                                                                                   |

|                                                   |             |                                                                                        |                                                                                                                                                                                                                                                                |
|---------------------------------------------------|-------------|----------------------------------------------------------------------------------------|----------------------------------------------------------------------------------------------------------------------------------------------------------------------------------------------------------------------------------------------------------------|
|                                                   |             |                                                                                        | Heidelberg Institute for Global Health, University of Heidelberg, Heidelberg, Germany                                                                                                                                                                          |
| Laura Merson, BSc                                 | L. Merson   | <a href="mailto:laura.merson@iddo.org">laura.merson@iddo.org</a>                       | Infectious Diseases Data Observatory (IDDO), Centre for Tropical Medicine and Global Health, Nuffield Department of Medicine, University of Oxford, UK                                                                                                         |
| Brian Mutinda, MSc<br>(Working Group Coordinator) | B. Mutinda  | <a href="mailto:bmutinda@covid19crc.org">bmutinda@covid19crc.org</a>                   | Mahidol Oxford Tropical Medicine Research Unit (MORU), Faculty of Tropical Medicine, Mahidol University, Bangkok, Thailand                                                                                                                                     |
| Dr Duduzile Ndwandwe, PhD                         | D. Ndwandwe | <a href="mailto:duduzile.ndwandwe@mrc.ac.za">duduzile.ndwandwe@mrc.ac.za</a>           | Cochrane South Africa, South African Medical Research Council, Cape Town, South Africa                                                                                                                                                                         |
| Dr Francine Ntoumi, PhD                           | F. Ntoumi   | <a href="mailto:francine.ntoumi@uni-tuebingen.de">francine.ntoumi@uni-tuebingen.de</a> | Directrice Generale de la Fondation Congolaise pour la Recherche Medicale, Brazzaville, Republic of Congo                                                                                                                                                      |
| Naomi Waithira, MSc                               | N. Waithira | <a href="mailto:Naomi@tropmedres.ac">Naomi@tropmedres.ac</a>                           | 1) Mahidol Oxford Tropical Medicine Research Unit (MORU), Faculty of Tropical Medicine, Mahidol University, Bangkok, Thailand<br>2) Centre for Tropical Medicine and Global Health, Nuffield Department of Clinical Medicine, University of Oxford, Oxford, UK |
| Helena Wilcox, BSc                                | H. Wilcox   | <a href="mailto:helena.wilcox@ndm.ox.ac.uk">helena.wilcox@ndm.ox.ac.uk</a>             | The Global Health Network (TGHN), Oxford, UK                                                                                                                                                                                                                   |

\*Corresponding authors
